# Supplementary material for: OsSCYL2 is Involved in Regulating ABA Signaling-Mediated Seed Germination in Rice
Source: MDPI journal article supplement (doi:10.3390/plants13081088), 2024-04-12
Supplement: s1 [file s1]

## *Supplementary Materials*

### **OsSCYL2 Is Involved in Regulating ABA Signaling-Mediated Seed Germination in Rice**

**Minyan Xu <sup>†</sup>, Wei Zhang <sup>†</sup>, Yuhuan Jiao, Qing Yang, Meng Chen, Hu Cheng, Beijiu Cheng and Xin Zhang <sup>\*</sup>**

National Engineering Laboratory of Crop Stress Resistance Breeding, School of Life Sciences, Anhui Agricultural University, Hefei 230036, China; xu285083469@163.com (M.X.); antoniatan@sina.com (W.Z.); m18355678848@163.com (Y.J.); y1162999081@163.com (Q.Y.); chenmengcm2022@163.com (M.C.); 15212917461@163.com (H.C.); cbj@ahau.edu.cn (B.C.)

<sup>\*</sup> Correspondence: xinzhang@ahau.edu.cn

<sup>†</sup> These authors contributed equally to this work.

**Table S1.** All primers were used for qRT-PCR and vector construction.

| Primer name    | Sequence (5' to 3')                                |
|----------------|----------------------------------------------------|
| OsActin1-qF    | TCTCTCTGTATGCCAGTGGTCGT                            |
| OsActin1-qR    | TCATAGTCCAGGGCGATGTAGG                             |
| OsSCYL2-qF     | TGGTCAGCGAAACCGAACACTAC                            |
| OsSCYL2-qR     | CAGAAGCAGATGGAGGAGGAGC                             |
| OsPP2C30-qF    | ACGAGTTCCTCATCCTGG                                 |
| OsPP2C30-qR    | GAGCACCGTCGTTGGGCG                                 |
| OsAp2-39-qF    | CGTGGCGGAGGGCGGAGGA                                |
| OsAp2-39-qR    | GGCGGGGCGTGGTGGTGGG                                |
| OsZIP09-qF     | GAAGGGATAGGGCTGGGAG                                |
| OsZIP09-qR     | TCATTGTAGGCGGAGGAGA                                |
| OsMYB44-qF     | CGGGTTCGGGCAGATTTT                                 |
| OsMYB44-qR     | AGGGAGCGAGAGGGAGAG                                 |
| OsNAC3-qF      | GTGTTCTACCACGGCAAGC                                |
| OsNAC3-qR      | ACAGCACCCAGTCATCCAG                                |
| OsSCYL2-GUS-F  | GAGAACACGGGGGACTCTTGACCAAAATCACCAAACACAC           |
| OsSCYL2-GUS-R  | AACTAGAAATTTACCCTCAGATCTACCAGTAAATCTAGAATAGG       |
| OsSCYL2-BD-F   | atggccatggaggccgaattcATGGCGCTGAACATGAAGACG         |
| OsSCYL2-BD-R   | ctagttatgcggccgctgcagCAGTAAATCTAGAATAGGTGGCTGC     |
| OsTOR-AD-F     | gccatggaggccagtgaattcCTAGATGCGATGTTTTCTGCTGG       |
| OsTOR-AD-R     | attcatctgcagctcgagctcTGGAGGATACTCATTATAAGGAGAGATAA |
| OsSCYL2-cLUC-F | tacgcgtcccggggcggtaccATGGCGCTGAACATGAAGACG         |
| OsSCYL2-cLUC-R | tacgcgtcccggggcggtaccATGGCGCTGAACATGAAGACG         |
| OsTOR-nLUC-F   | acgggggacgagctcggtaccCTAGATGCGATGTTTTCTGCTGG       |
| OsTOR-nLUC-R   | cgagatctggtcgacactagtTGGAGGATACTCATTATAAGGAGAGATAA |
| OsSCYL2-GST-F  | ccgcgtggtatccccgaattcATGGCGCTGAACATGAAGACG         |
| OsSCYL2-GST-R  | gatgcggccgctcgagtcgacCAGTAAATCTAGAATAGGTGGCTGCT    |
| OsTOR-MBP-F    | gagggaaggatttcagaattcCTAGATGCGATGTTTTCTGCTGG       |
| OsTOR-MBP-R    | cagtccaagcttgctgcagTGGAGGATACTCATTATAAGGAGAGATAA   |
